# Supplementary material
Source: Elsevier journal article supplement (https://comptes-rendus.academie-sciences.fr/chimie/article/10.1016/j.crci.2013.05.005/file/attach/mmc1.pdf)
Supplement: mmc1 [file mmc1.pdf]

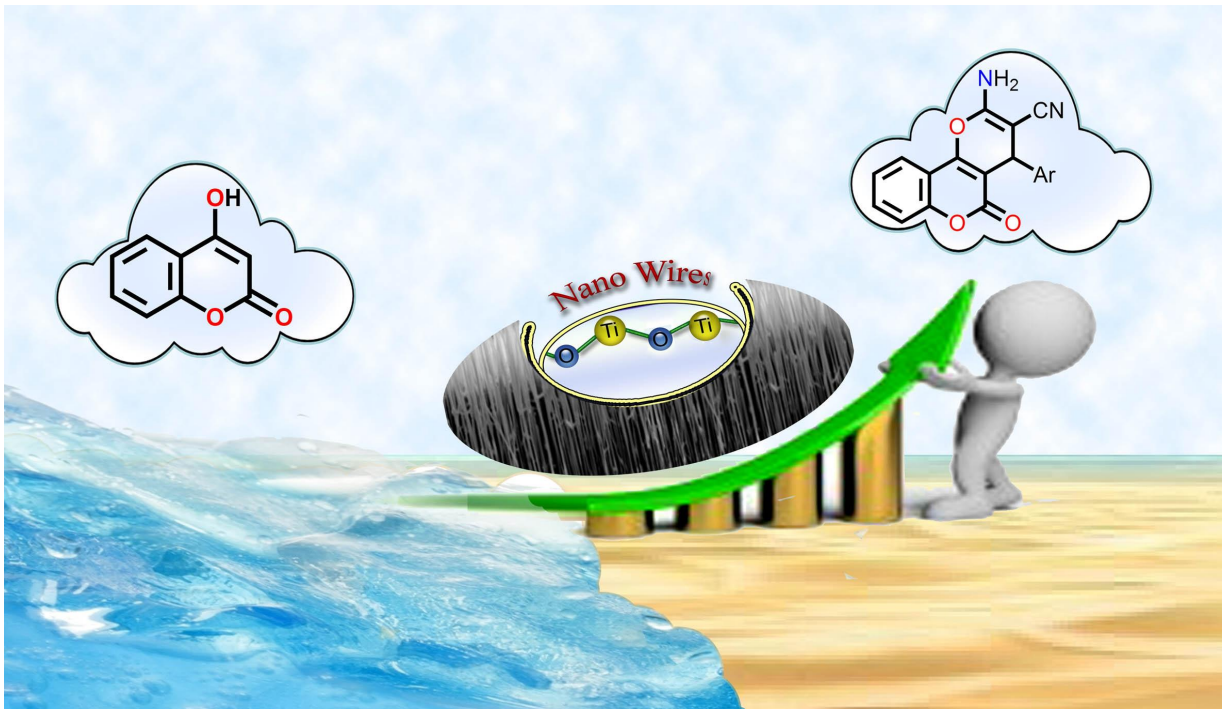

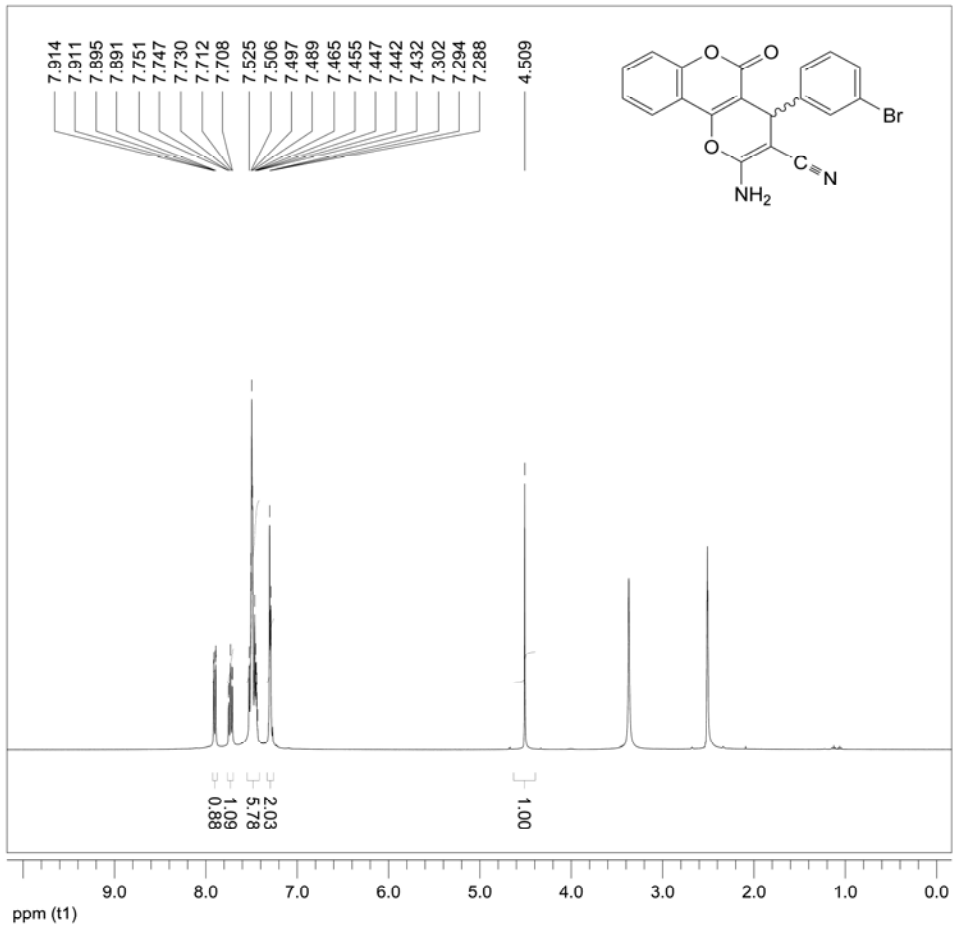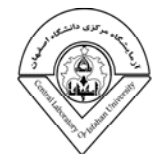

Instrument Specifications:  
 NMR Spectrometer 400 MHz, Avance III 400  
 Bruker, Germany

**Date:**  
 29 Jul 2012  
**Spectrum Title:**  
 Khodabakhshi (KH1)  
 DMSO-1H NMR  
**Frequency (MHz):**  
 (f1) 400.130  
**Original Points Count:**  
 (f1) 32768  
**Actual Points Count:**  
 (f1) 32768  
**Acquisition Time (sec):**  
 (f1) 3.8928  
**Spectral Width (ppm):**  
 (f1) 21.037  
**Pulse Program:**  
 Unknown

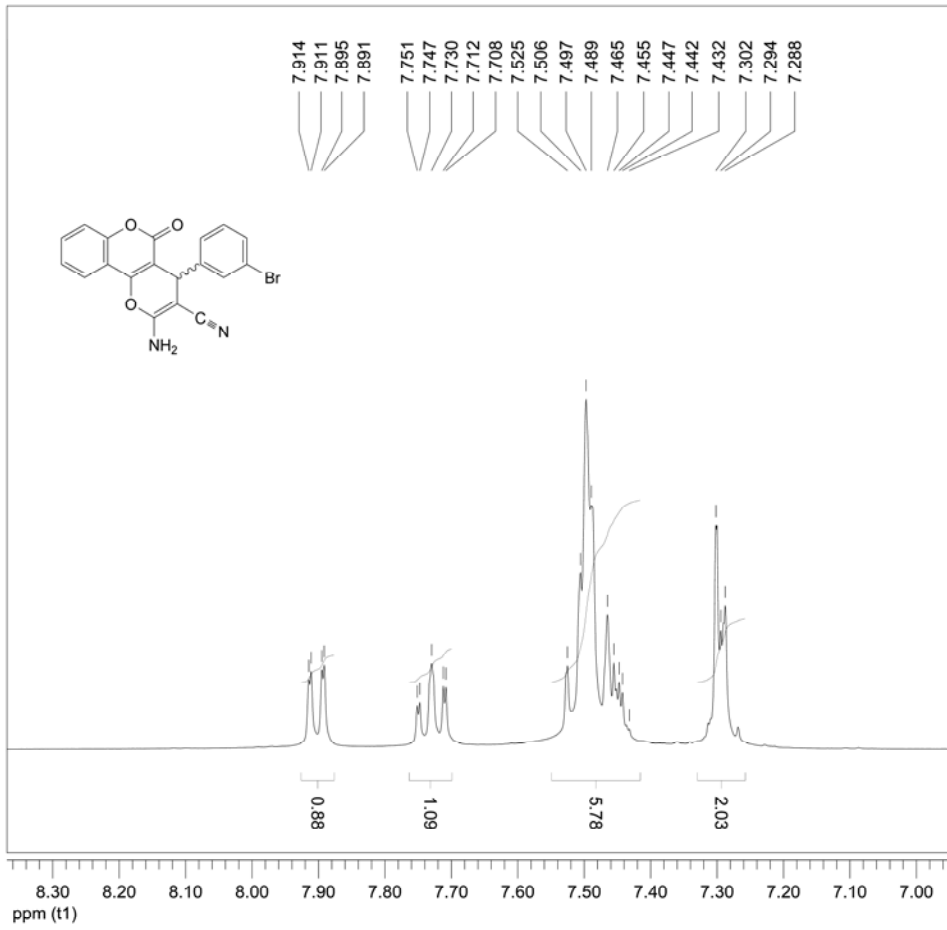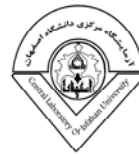

Instrument Specifications:  
NMR Spectrometer 400 MHz, Avance II 400  
Bruker, Germany

**Date:**  
29 Jul 2012

**Spectrum Title:**  
Khodabakhshi (KH1)  
DMSO-1H NMR

**Frequency (MHz):**  
(f1) 400.130

**Original Points Count:**  
(f1) 32768

**Actual Points Count:**  
(f1) 32768

**Acquisition Time (sec):**  
(f1) 3.8928

**Spectral Width (ppm):**  
(f1) 21.037

**Pulse Program:**  
Unknown

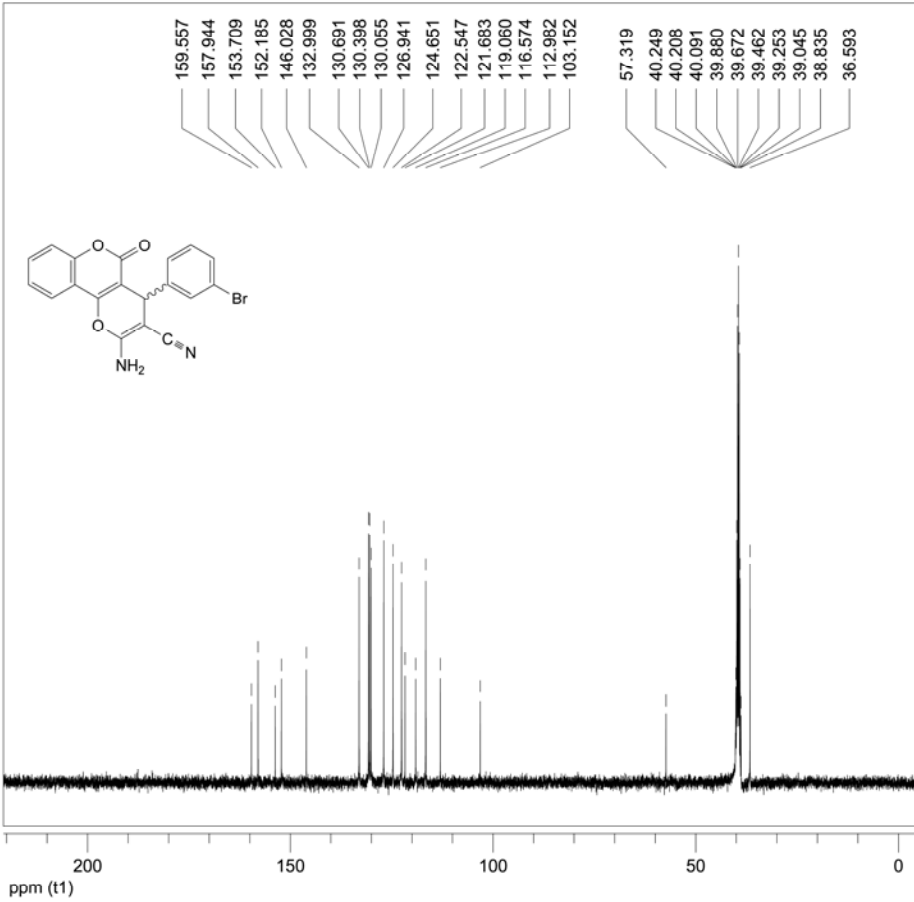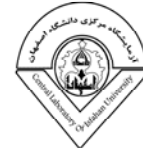

Instrument Specifications:  
NMR Spectrometer 400 MHz, Avance II 400  
Bruker, Germany

**Date:**

29 Jul 2012

**Spectrum Title:**

Khodabakhshi (KH1)

DMSO-13C NMR

**Frequency (MHz):**

(f1) 100.613

**Original Points Count:**

(f1) 32768

**Actual Points Count:**

(f1) 32768

**Acquisition Time (sec):**

(f1) 1.2583

**Spectral Width (ppm):**

(f1) 258.830

**Pulse Program:**

Unknown

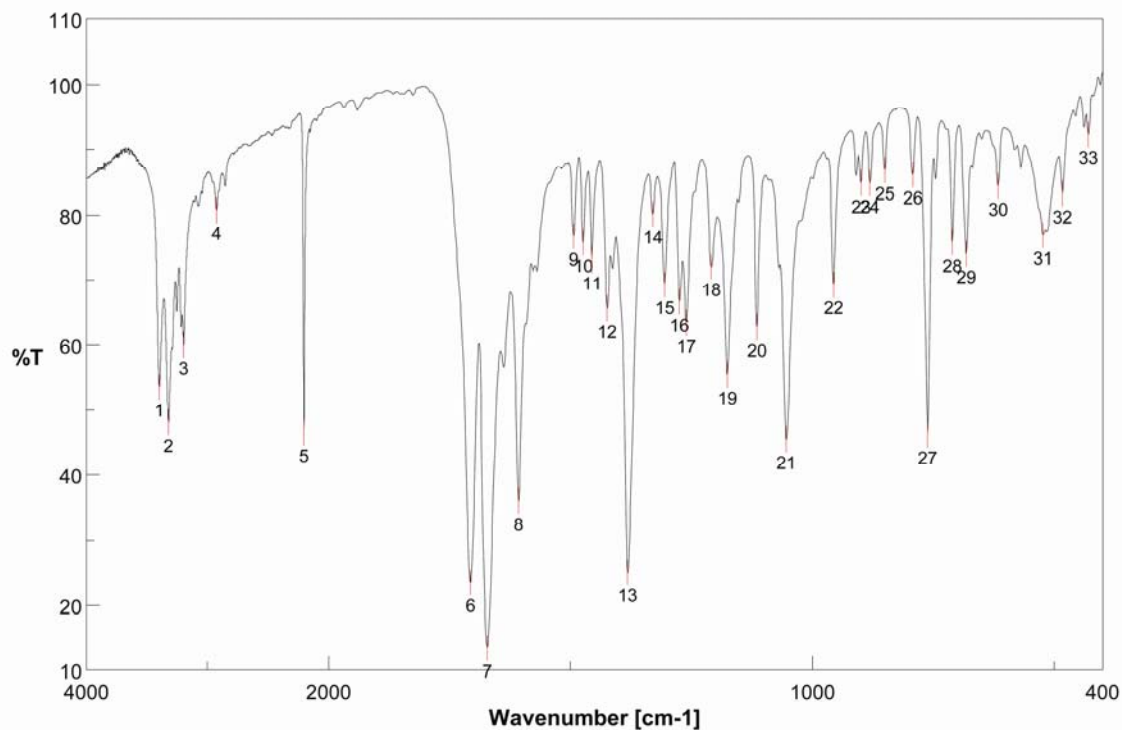

Accumulation Auto (24 )  
 Resolution 4 cm-1  
 Zero Filling ON  
 Apodization Cosine  
 Gain Auto (2)  
 Scanning Speed Auto (2 mm/sec)  
 Date/Time 2012/06/30 ط.ب.ظ:6:16  
 Update 2012/06/30 ط.ب.ظ:6:18  
 Operator  
 File Name  
 Sample Name  
 Comment

Memory#2

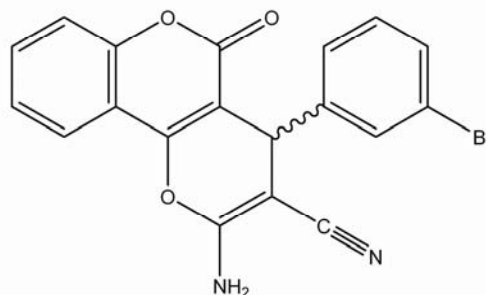

| No. | cm-1    | %T        | No. | cm-1    | %T        | No. | cm-1    | %T        |
|-----|---------|-----------|-----|---------|-----------|-----|---------|-----------|
| 1   | 3396.99 | 5.35E+001 | 2   | 3321.78 | 4.81E+001 | 3   | 3195.47 | 6.00E+001 |
| 4   | 2924.52 | 8.07E+001 | 5   | 2202.31 | 4.66E+001 | 6   | 1706.69 | 2.35E+001 |
| 7   | 1671.98 | 1.35E+001 | 8   | 1607.38 | 3.61E+001 | 9   | 1493.6  | 7.67E+001 |
| 10  | 1473.35 | 7.58E+001 | 11  | 1455.99 | 7.31E+001 | 12  | 1424.17 | 6.56E+001 |
| 13  | 1381.75 | 2.51E+001 | 14  | 1329.68 | 8.02E+001 | 15  | 1305.57 | 6.92E+001 |
| 16  | 1274.72 | 6.66E+001 | 17  | 1260.25 | 6.34E+001 | 18  | 1209.15 | 7.20E+001 |
| 19  | 1175.4  | 5.55E+001 | 20  | 1114.65 | 6.27E+001 | 21  | 1053.91 | 4.55E+001 |
| 22  | 956.52  | 6.92E+001 | 23  | 899.63  | 8.48E+001 | 24  | 881.309 | 8.49E+001 |
| 25  | 850.454 | 8.68E+001 | 26  | 792.6   | 8.61E+001 | 27  | 761.744 | 4.62E+001 |
| 28  | 710.64  | 7.58E+001 | 29  | 681.713 | 7.40E+001 | 30  | 616.145 | 8.44E+001 |
| 31  | 523.579 | 7.69E+001 | 32  | 483.081 | 8.33E+001 | 33  | 430.048 | 9.23E+001 |

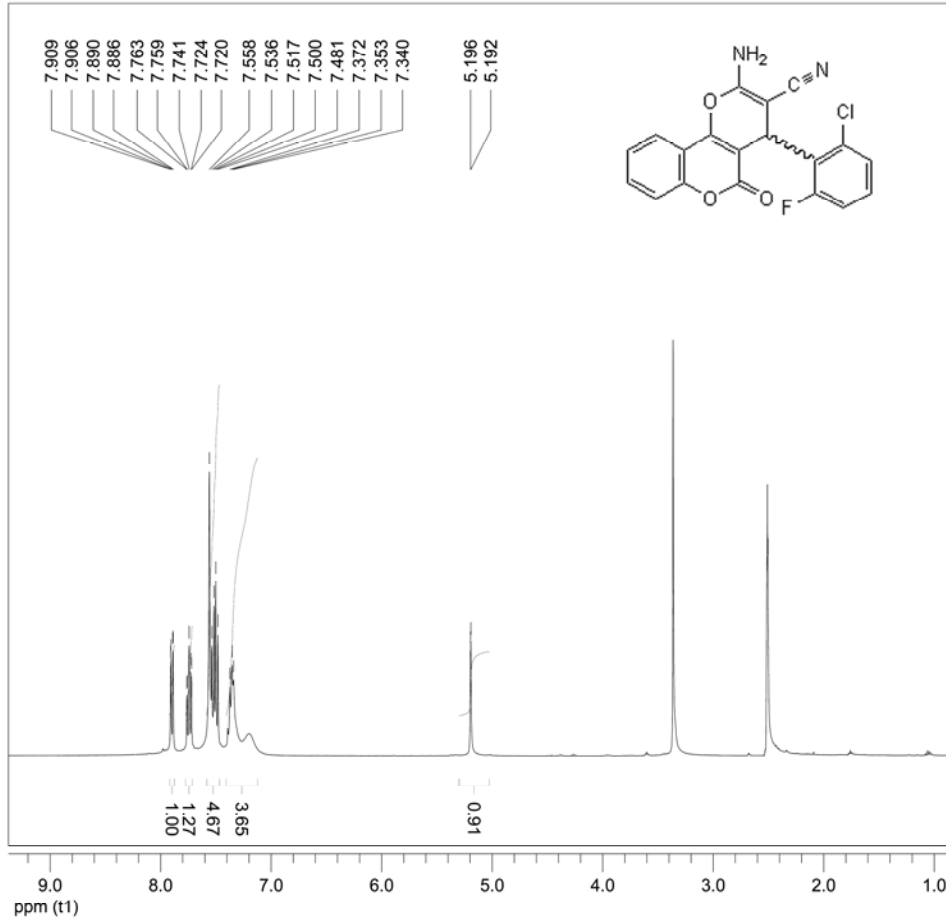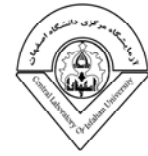

Instrument Specifications:  
NMR Spectrometer 400 MHz, Avance III 400  
Bruker, Germany

**Date:**  
29 Jul 2012

**Spectrum Title:**  
Khoda bakhshi (KH2)  
DMSO-1H NMR

**Frequency (MHz):**  
(f1) 400.130

**Original Points Count:**  
(f1) 32768

**Actual Points Count:**  
(f1) 32768

**Acquisition Time (sec):**  
(f1) 3.8928

**Spectral Width (ppm):**  
(f1) 21.037

**Pulse Program:**  
Unknown

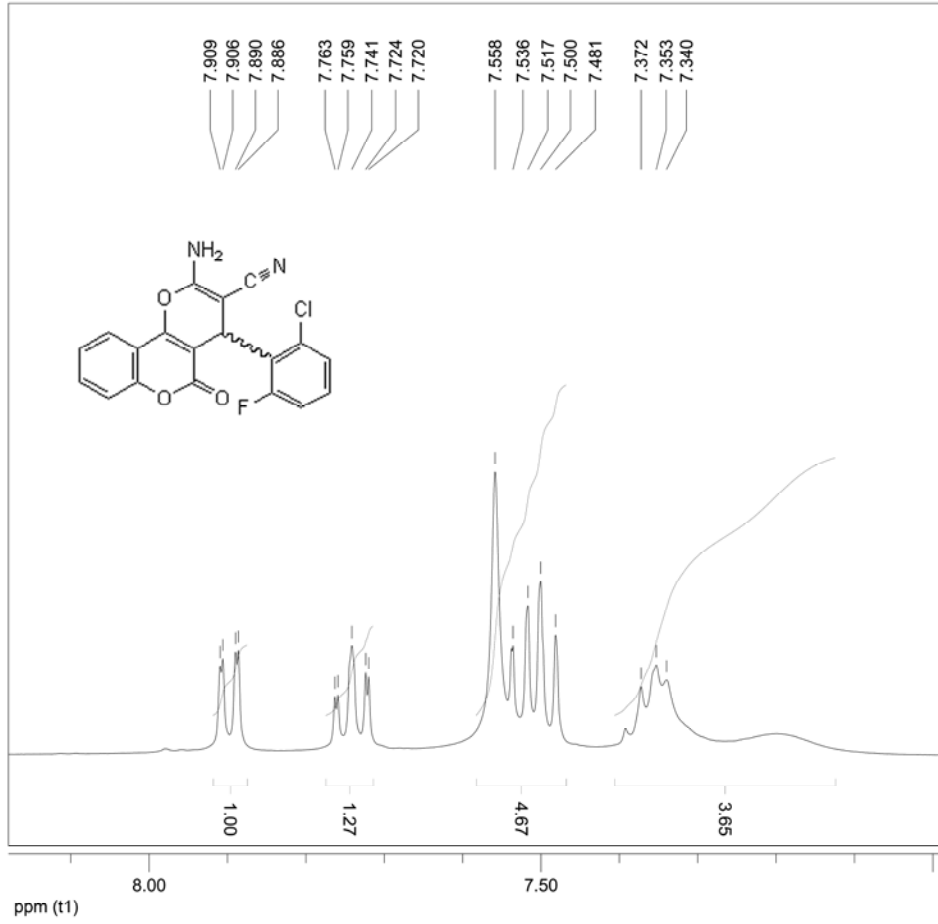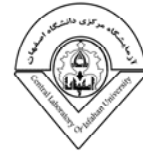

Instrument Specifications:  
NMR Spectrometer 400 MHz, Avance II 400  
Bruker, Germany

**Date:**  
29 Jul 2012

**Spectrum Title:**  
Khoda bakhshi (KH2)  
DMSO-1H NMR

**Frequency (MHz):**  
(f1) 400.130

**Original Points Count:**  
(f1) 32768

**Actual Points Count:**  
(f1) 32768

**Acquisition Time (sec):**  
(f1) 3.8928

**Spectral Width (ppm):**  
(f1) 21.037

**Pulse Program:**  
Unknown

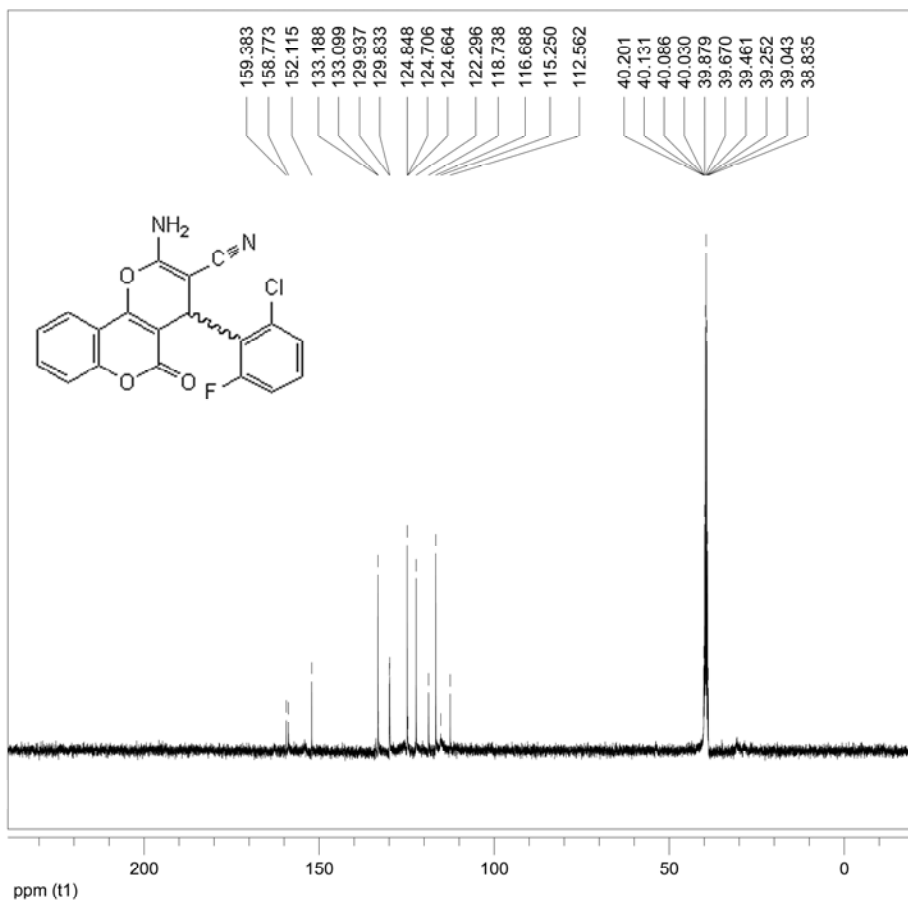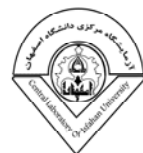

Instrument Specifications:  
NMR Spectrometer 400 MHz, Avance III 400  
Bruker, Germany

**Date:**  
29 Jul 2012  
**Document's Title:**  
CNMR.mrc

**Spectrum Title:**

**Frequency (MHz):**  
(f1) 100.613  
**Original Points Count:**  
(f1) 32768  
**Actual Points Count:**  
(f1) 32768  
**Acquisition Time (sec):**  
(f1) 1.2583  
**Spectral Width (ppm):**  
(f1) 258.830  
**Pulse Program:**  
Unknown



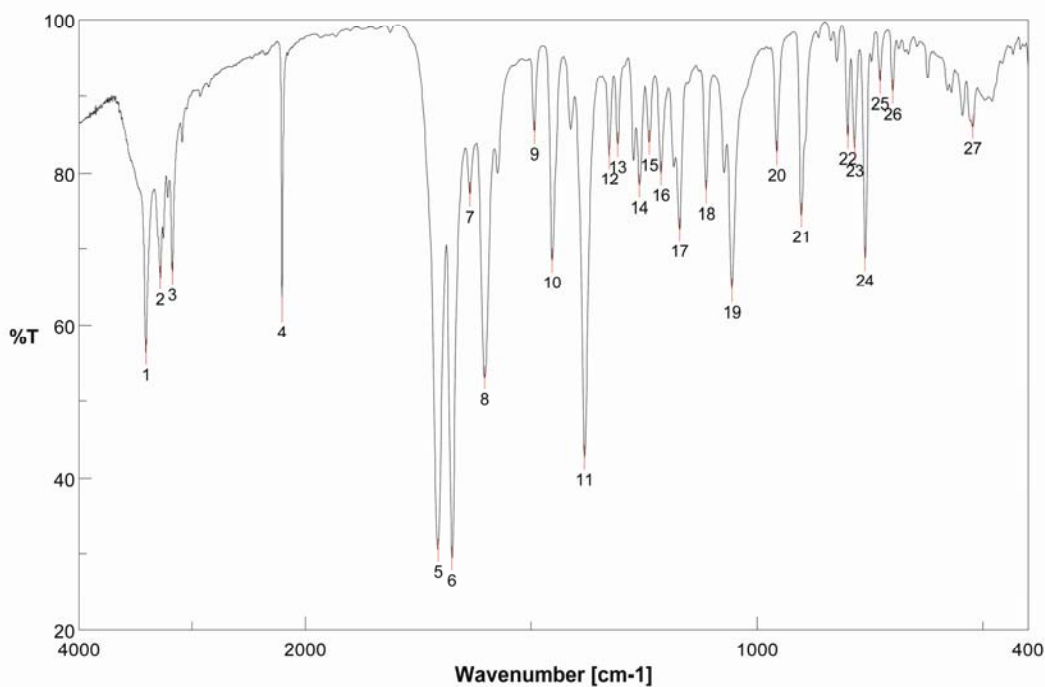

Accumulation Auto (21 )  
 Resolution 4 cm-1  
 Zero Filling ON  
 Apodization Cosine  
 Gain Auto (2)  
 Scanning Speed Auto (2 mm/sec)  
 Date/Time 2012/06/30 ب.ظ 7:16  
 Update 2012/06/30 ب.ظ 7:16  
 Operator  
 File Name  
 Sample Name  
 Comment

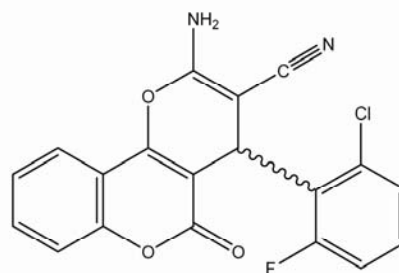

| No. | cm-1    | %T        | No. | cm-1    | %T        | No. | cm-1    | %T        |
|-----|---------|-----------|-----|---------|-----------|-----|---------|-----------|
| 1   | 3408.57 | 5.64E+001 | 2   | 3280.32 | 6.62E+001 | 3   | 3175.22 | 6.68E+001 |
| 4   | 2203.27 | 6.20E+001 | 5   | 1705.73 | 3.06E+001 | 6   | 1674.87 | 2.94E+001 |
| 7   | 1635.34 | 7.72E+001 | 8   | 1602.56 | 5.31E+001 | 9   | 1492.63 | 8.54E+001 |
| 10  | 1453.1  | 6.85E+001 | 11  | 1381.75 | 4.27E+001 | 12  | 1326.79 | 8.21E+001 |
| 13  | 1308.46 | 8.37E+001 | 14  | 1260.25 | 7.84E+001 | 15  | 1238.08 | 8.40E+001 |
| 16  | 1213.01 | 7.99E+001 | 17  | 1171.54 | 7.26E+001 | 18  | 1112.73 | 7.75E+001 |
| 19  | 1055.84 | 6.46E+001 | 20  | 956.52  | 8.27E+001 | 21  | 901.558 | 7.45E+001 |
| 22  | 799.35  | 8.47E+001 | 23  | 783.922 | 8.33E+001 | 24  | 760.78  | 6.87E+001 |
| 25  | 727.996 | 9.20E+001 | 26  | 700.033 | 9.07E+001 | 27  | 522.615 | 8.61E+001 |

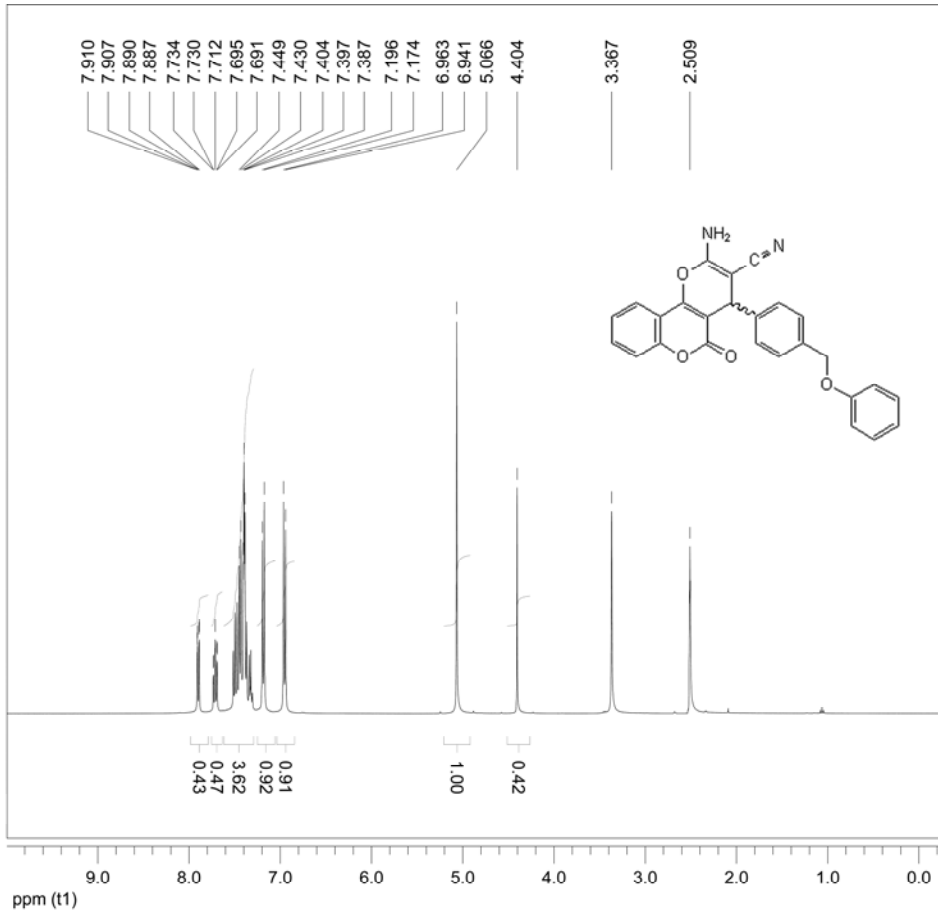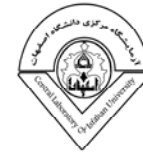

Instrument Specifications:  
NMR Spectrometer 400 MHz, Avance II 400  
Bruker, Germany

**Date:**

29 Jul 2012

**Spectrum Title:**

Khodabakhshi (KH4)  
DMSO-1H NMR

**Frequency (MHz):**

(f1) 400.130

**Original Points Count:**

(f1) 32768

**Actual Points Count:**

(f1) 32768

**Acquisition Time (sec):**

(f1) 3.8928

**Spectral Width (ppm):**

(f1) 21.037

**Pulse Program:**

Unknown

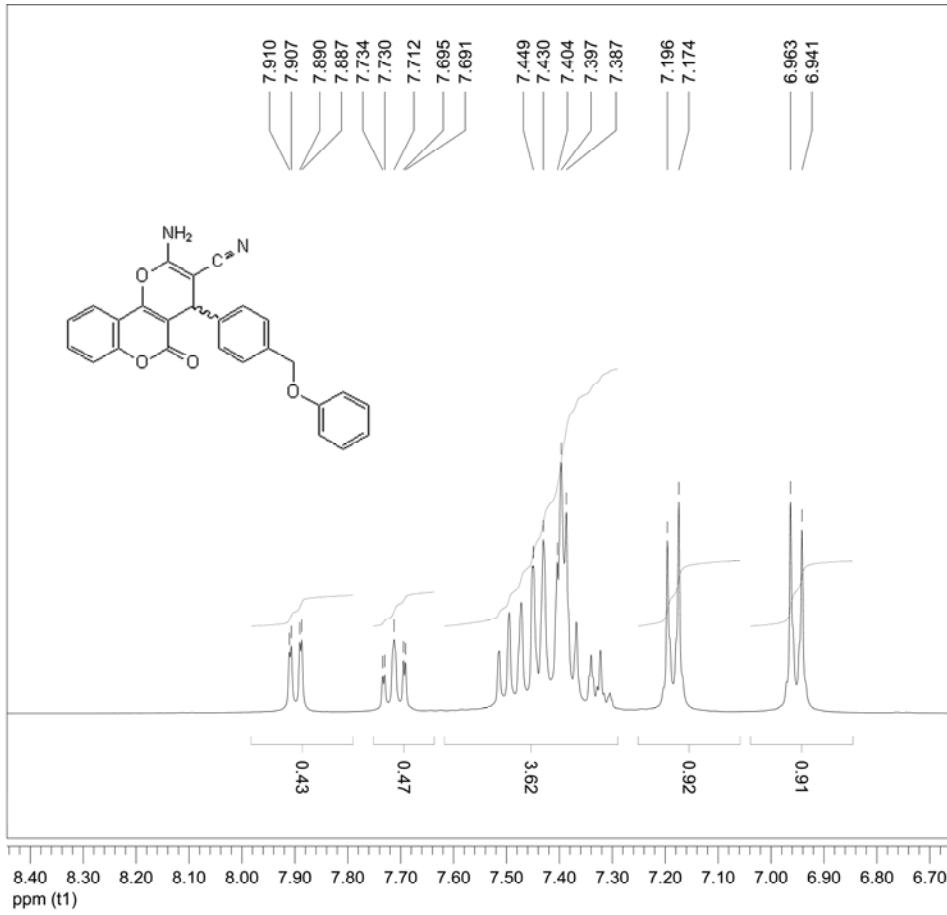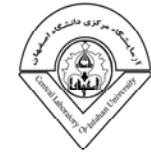

Instrument Specifications:  
NMR Spectrometer 400 MHz, Avance II 400  
Bruker, Germany

**Date:**  
29 Jul 2012

**Spectrum Title:**  
Khodabakhshi (KH4)  
DMSO-1H NMR

**Frequency (MHz):**  
(f1) 400.130

**Original Points Count:**  
(f1) 32768

**Actual Points Count:**  
(f1) 32768

**Acquisition Time (sec):**  
(f1) 3.8928

**Spectral Width (ppm):**  
(f1) 21.037

**Pulse Program:**  
Unknown

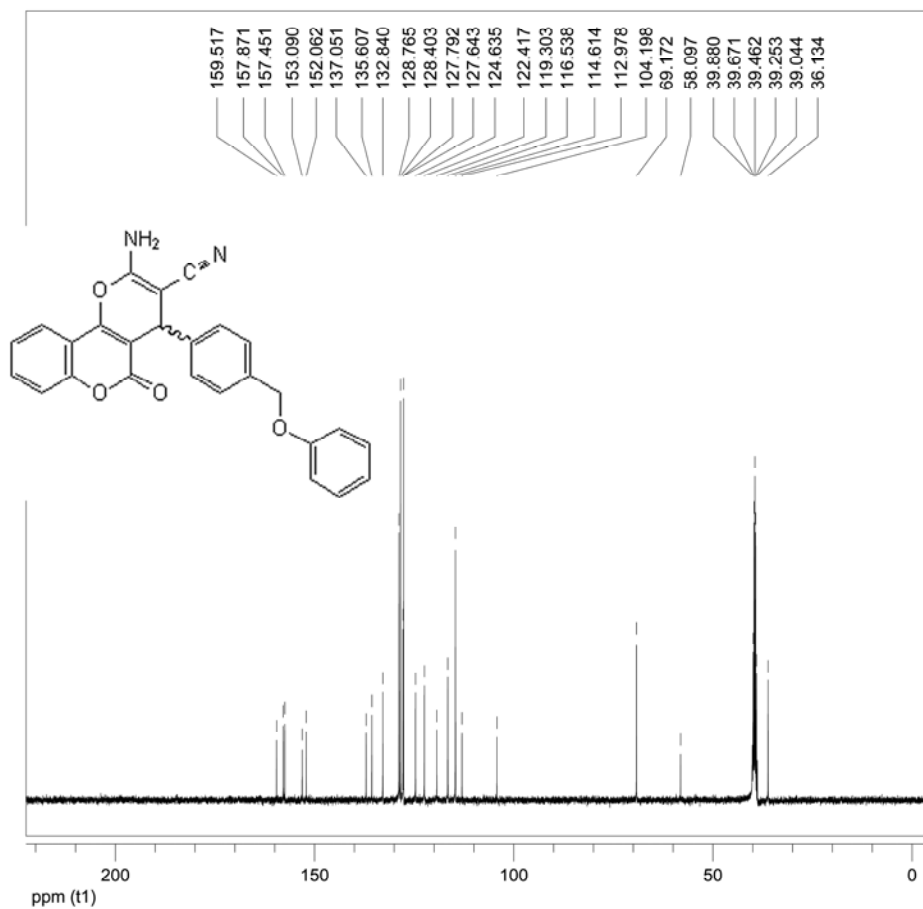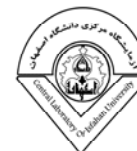

Instrument Specifications:  
NMR Spectrometer 400 MHz, Avance III 400  
Bruker, Germany

**Date:**  
29 Jul 2012

**Spectrum Title:**  
Khodabakhshi (KH4)  
DMSO-13C NMR

**Frequency (MHz):**  
(f1) 100.613

**Original Points Count:**  
(f1) 32768

**Actual Points Count:**  
(f1) 32768

**Acquisition Time (sec):**  
(f1) 1.2583

**Spectral Width (ppm):**  
(f1) 258.830

**Pulse Program:**  
Unknown

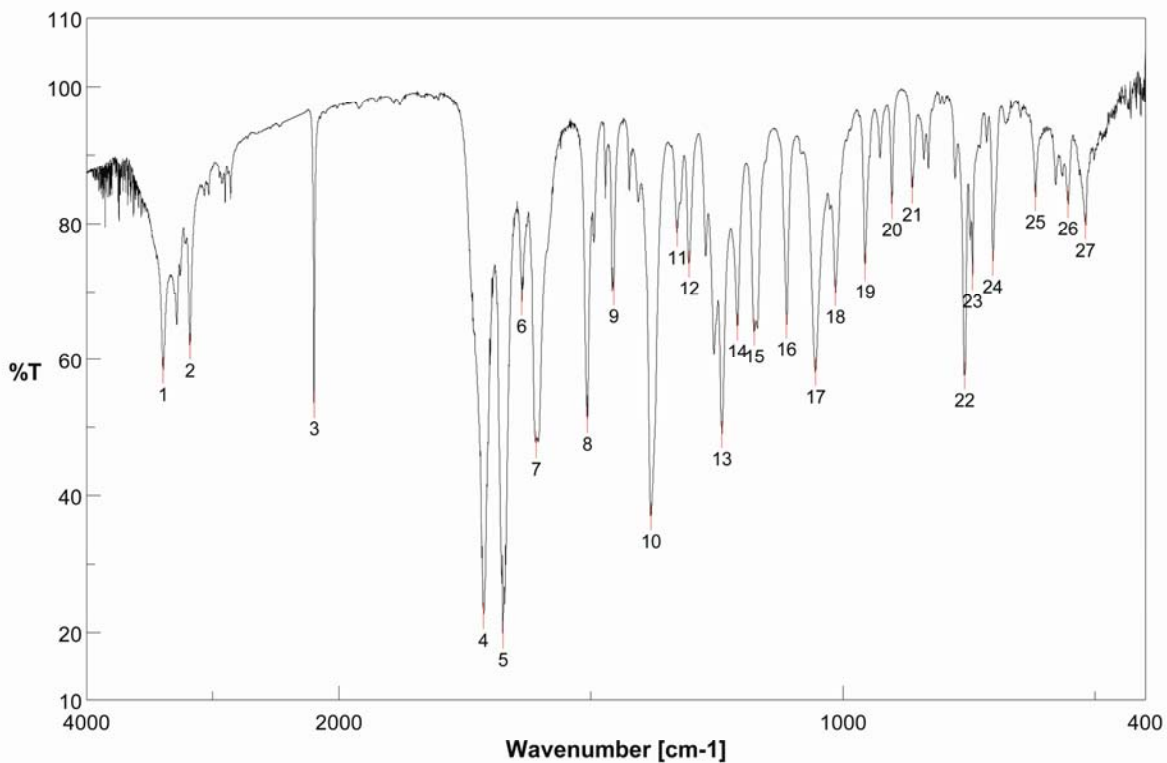

Accumulation Auto (23 )  
 Resolution 1 cm-1  
 Zero Filling ON  
 Apodization Cosine  
 Gain Auto (2)  
 Scanning Speed Auto (2 mm/sec)  
 Date/Time 2012/06/30 ب.ظ:5:21  
 Update 2012/06/30 ب.ظ:5:41  
 Operator  
 File Name 4-coum+bezyloxybenaldehyde+Malon  
 Sample Name  
 Comment

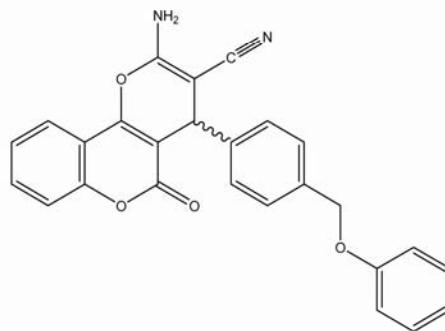

| No. | cm-1    | %T        | No. | cm-1    | %T        | No. | cm-1    | %T        |
|-----|---------|-----------|-----|---------|-----------|-----|---------|-----------|
| 1   | 3391.45 | 5.84E+001 | 2   | 3180.04 | 6.19E+001 | 3   | 2196.04 | 5.34E+001 |
| 4   | 1712.96 | 2.24E+001 | 5   | 1674.39 | 1.97E+001 | 6   | 1636.79 | 6.85E+001 |
| 7   | 1608.58 | 4.75E+001 | 8   | 1506.37 | 5.12E+001 | 9   | 1454.55 | 7.00E+001 |
| 10  | 1381.02 | 3.70E+001 | 11  | 1328.95 | 7.86E+001 | 12  | 1305.33 | 7.41E+001 |
| 13  | 1240    | 4.90E+001 | 14  | 1209.39 | 6.48E+001 | 15  | 1175.88 | 6.40E+001 |
| 16  | 1111.76 | 6.51E+001 | 17  | 1054.63 | 5.81E+001 | 18  | 1014.86 | 6.99E+001 |
| 19  | 956.279 | 7.37E+001 | 20  | 903.005 | 8.27E+001 | 21  | 862.507 | 8.49E+001 |
| 22  | 759.334 | 5.76E+001 | 23  | 742.942 | 7.22E+001 | 24  | 702.926 | 7.44E+001 |
| 25  | 618.074 | 8.39E+001 | 26  | 553.47  | 8.28E+001 | 27  | 518.999 | 7.97E+001 |

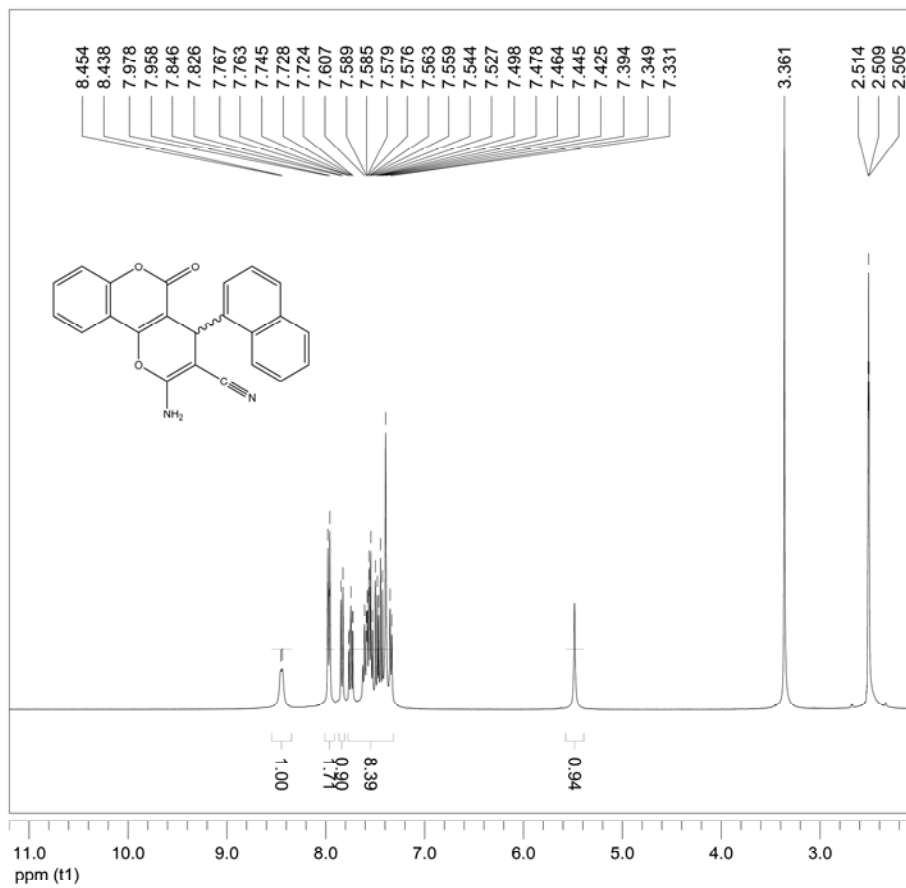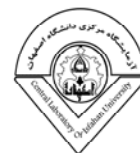

Instrument Specifications:  
NMR Spectrometer 400 MHz, Avance II 400  
Bruker, Germany

**Date:**  
29 Jul 2012

**Spectrum Title:**  
Khodabakhshi (KH3)  
DMSO-1H NMR

**Frequency (MHz):**  
(f1) 400.130

**Original Points Count:**  
(f1) 32768

**Actual Points Count:**  
(f1) 32768

**Acquisition Time (sec):**  
(f1) 3.8928

**Spectral Width (ppm):**  
(f1) 21.037

**Pulse Program:**  
Unknown

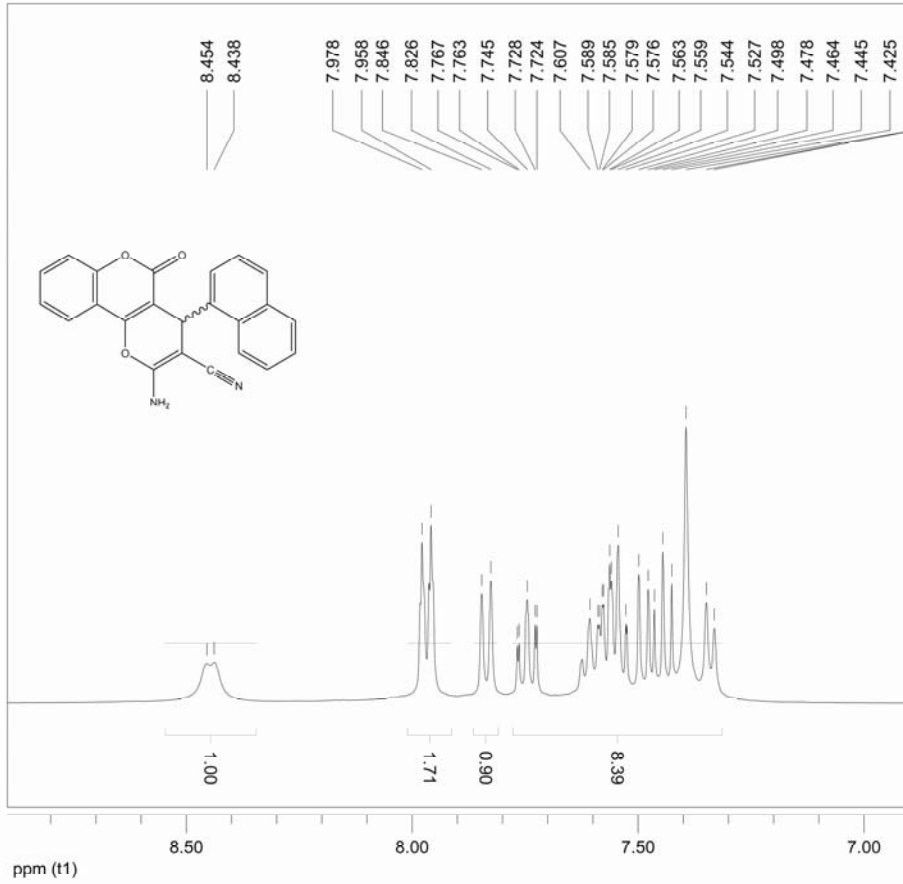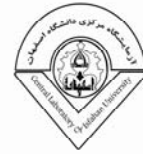

Instrument Specifications:  
NMR Spectrometer 400 MHz, Avance III 400  
Bruker, Germany

**Date:**

29 Jul 2012

**Spectrum Title:**

Khodabakhshi (Expand-KH3)  
DMSO-1H NMR

**Frequency (MHz):**

(f1) 400.130

**Original Points Count:**

(f1) 32768

**Actual Points Count:**

(f1) 32768

**Acquisition Time (sec):**

(f1) 3.8928

**Spectral Width (ppm):**

(f1) 21.037

**Pulse Program:**

Unknown

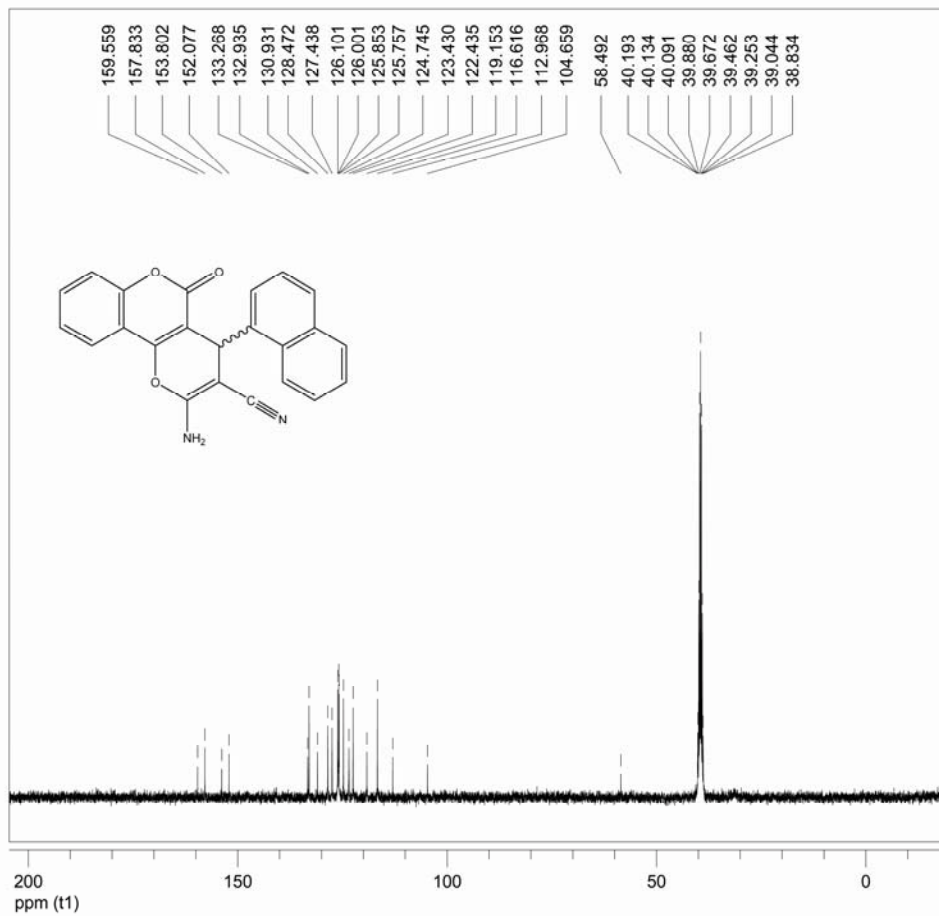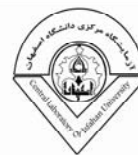

Instrument Specifications:  
NMR Spectrometer 400 MHz, Avance II 400  
Bruker, Germany

**Date:**

30 Jul 2012

**Spectrum Title:**

Khodabakhshi (KH3)  
DMSO-13C NMR

**Frequency (MHz):**

(f1) 100.613

**Original Points Count:**

(f1) 32768

**Actual Points Count:**

(f1) 32768

**Acquisition Time (sec):**

(f1) 1.2583

**Spectral Width (ppm):**

(f1) 258.830

**Pulse Program:**

Unknown



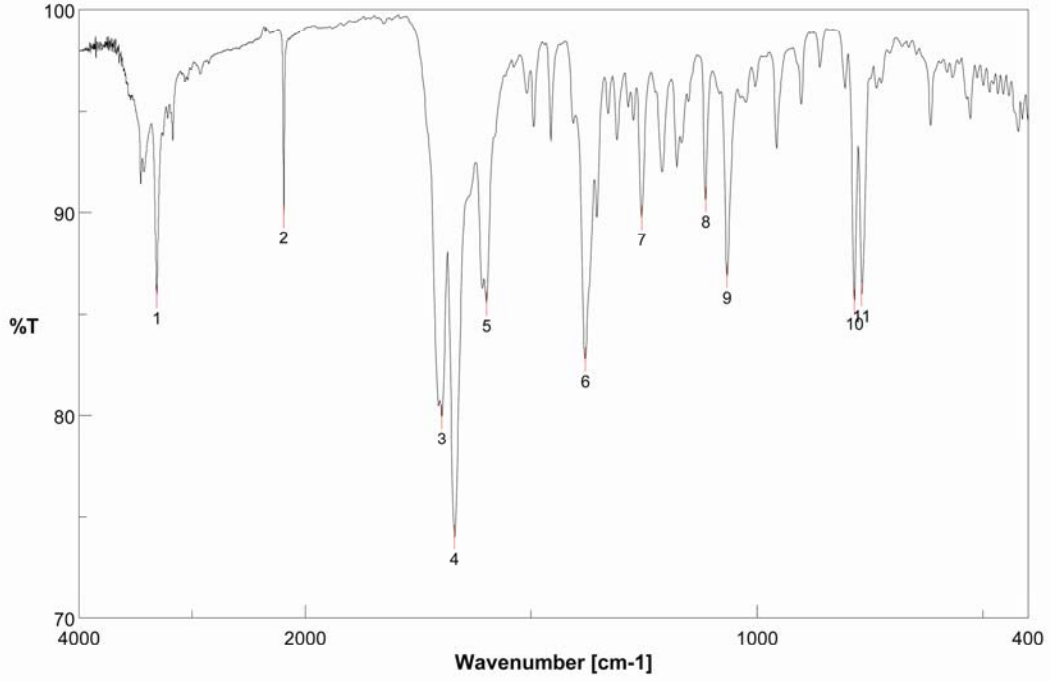

Accumulation Auto (17 )  
 Resolution 4 cm-1  
 Zero Filling ON  
 Apodization Cosine  
 Gain Auto (1)  
 Scanning Speed Auto (2 mm/sec)  
 Date/Time 2012/06/30 7:01  
 Update 2012/06/30 7:03  
 Operator  
 File Name  
 Sample Name  
 Comment Memory#3

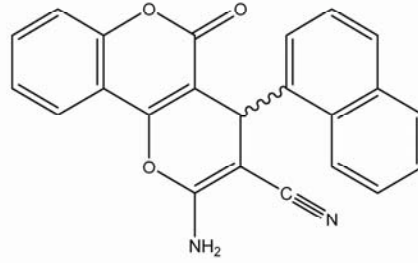

| No. | cm-1    | %T        | No. | cm-1    | %T        | No. | cm-1    | %T        |
|-----|---------|-----------|-----|---------|-----------|-----|---------|-----------|
| 1   | 3312.14 | 8.59E+001 | 2   | 2188.81 | 8.98E+001 | 3   | 1697.05 | 7.99E+001 |
| 4   | 1669.09 | 7.40E+001 | 5   | 1598.7  | 8.55E+001 | 6   | 1379.82 | 8.28E+001 |
| 7   | 1255.43 | 8.97E+001 | 8   | 1113.69 | 9.06E+001 | 9   | 1066.44 | 8.69E+001 |
| 10  | 784.886 | 8.56E+001 | 11  | 768.494 | 8.60E+001 |     |         |           |

### Characterization data of new compounds

**Compound (4i).** IR (KBr): 3396, 3321, 3195, 2202, 1706, 1671, 1607, 1381, 1053  $\text{cm}^{-1}$ .  $^1\text{H}$  NMR (DMSO, 400 MHz):  $\delta$  7.90 (dd, 1H,  $J=7.8, 1.2$  Hz), 7.75-7.70 (m, 1H), 7.52-7.43 (m, 6H), 7.30-7.28 (m, 2H), 4.50 (s, 1H) ppm.  $^{13}\text{C}$  NMR (DMSO, 100 MHz):  $\delta$  159.55, 157.94, 153.70, 152.18, 146.02, 132.99, 130.69, 130.39, 130.05, 126.94, 124.65, 122.54, 121.68, 119.05, 116.57, 112.98, 103.15, 57.31, 36.59. Anal. Calcd. for  $\text{C}_{19}\text{H}_{11}\text{BrN}_2\text{O}_3$ : C, 57.74; H, 2.81; N, 7.09 %. Found: C, 58.05; H, 2.68; N, 7.16 %.

**Compound (4j).** IR (KBr): 3408, 3280, 3175, 2203, 1705, 1674, 1602, 1381, 1055  $\text{cm}^{-1}$ .  $^1\text{H}$  NMR (DMSO, 400 MHz):  $\delta$  7.90 (dd, 1H,  $J=7.8, 1.2$  Hz), 7.76-7.72 (m, 1H), 7.55-7.48 (m, 4H), 7.55-7.19 (m, 3H), 5.19 (d, 1H,  $J=1.6$  Hz).  $^{13}\text{C}$  NMR (DMSO, 100 MHz):  $\delta$  159.38, 158.77, 152.11, 133.18, 133.09, 129.93, 129.83, 124.84, 124.70, 124.66, 122.29, 118.73, 116.68, 115.25, 112.56, 38.83 ppm. Anal. Calcd. for  $\text{C}_{19}\text{H}_{10}\text{ClFN}_2\text{O}_3$ : C, 61.89; H, 2.73; N, 7.60 %. Found: C, 61.90; H, 2.55; N, 7.72 %.

**Compound (4k).** IR (KBr): 3391, 3180, 2196, 1712, 1674, 1608, 1381, 1240, 1054  $\text{cm}^{-1}$ .  $^1\text{H}$  NMR (DMSO, 400 MHz):  $\delta$  7.90 (dd, 1H,  $J=8.0$  Hz), 7.73-7.69 (m, 1H), 7.44-7.38 (m, 7H), 7.18 (d, 2H,  $J=8.8$  Hz), 6.95 (d, 2H,  $J=8.8$  Hz), 5.06 (s, 2H), 4.40 (s, 1H).  $^{13}\text{C}$  NMR (DMSO, 100 MHz):  $\delta$  159.51, 157.87, 157.45, 153.09, 152.06, 137.05, 135.60, 132.83, 128.76, 128.40, 127.79, 127.64, 124.63, 122.41, 119.30, 116.53, 114.61, 112.97, 104.19, 69.17, 58.09, 36.13. Anal. Calcd. for  $\text{C}_{26}\text{H}_{18}\text{N}_2\text{O}_4$ : C, 73.92; H, 4.29; N, 6.63 %. Found: C, 74.15; H, 4.15; N, 6.79 %.

**Compound (4l).** IR (KBr): 3340, 3312, 2188, 1697, 1669, 1598, 1379, 1066  $\text{cm}^{-1}$ .  $^1\text{H}$  NMR (DMSO, 400 MHz):  $\delta$  8.44 (d, 1H,  $J=6.4$  Hz), 7.96 (d, 2H,  $J=8.0$  Hz), 7.83 (d, 1H,  $J=8.0$  Hz), 7.76-7.33 (m, 8H), 5.48 (s, 1H).  $^{13}\text{C}$  NMR (DMSO, 100 MHz):  $\delta$  159.55, 157.83, 153.80, 152.07, 133.26, 132.93, 130.93, 128.47, 127.43, 126.10, 126.00, 125.85, 125.75, 124.74, 123.43, 122.43, 119.15, 116.61, 112.96, 104.65, 58.49 ppm. Anal. Calcd. for  $\text{C}_{23}\text{H}_{14}\text{N}_2\text{O}_3$ : C, 75.40; H, 3.85; N, 7.65 %. Found: C, 75.65; H, 3.70; N, 7.53 %.
